# Supplementary material for: Quercetin alleviates PM2.5-induced chronic lung injury in mice by targeting ferroptosis
Source: PeerJ. 2024 Jan 2;12:e16703. doi: 10.7717/peerj.16703 (PMC10768656; doi:10.7717/peerj.16703)
Supplement: Supplemental Information 7 [file peerj-12-16703-s007.xlsx]

## Sheet: Figure1
group1	lung weight/body weight	IL-1beta	IL-6	TNF-alpha	group2	SCORES
Control	3.91156	20.921	29.4109	19.9788	Control	1
Control	4.14716	22.2254	30.7626	14.3241	Control	1
Control	3.76307	18.3122	33.6438	15.8465	Control	1
Control	3.92739	22.8776	31.7586	18.8913	Control	0
Control	4.30034	22.2254	34.2129	20.6313	Control	2
Control	4.10169	20.2688	34.6754	19.5438	PM2.5	5
PM2.5	4.46043	34.1824	52.1049	41.2928	PM2.5	6
PM2.5	4.29967	39.1826	57.0136	43.4677	PM2.5	4
PM2.5	4.37722	38.0956	58.8277	42.1628	PM2.5	5
PM2.5	3.57377	37.4434	55.1995	40.8578	PM2.5	6
PM2.5	3.91156	32.6606	53.919	47.6	PM2.5-Que50	4
PM2.5	3.99317	33.3128	54.6304	44.5552	PM2.5-Que50	3
PM2.5-Que50	4.15808	33.5302	53.172	38.6829	PM2.5-Que50	4
PM2.5-Que50	3.76623	34.3998	51.8203	32.5932	PM2.5-Que50	4
PM2.5-Que50	4.49827	28.3126	50.4687	36.508	PM2.5-Que50	2
PM2.5-Que50	3.75839	30.2692	49.366	32.3757	PM2.5-Que100	3
PM2.5-Que50	3.94464	29.617	47.6586	34.7681	PM2.5-Que100	3
PM2.5-Que50	4.10345	30.9214	52.425	36.7255	PM2.5-Que100	2
PM2.5-Que100	4.00662	25.7038	49.7572	35.8556	PM2.5-Que100	3
PM2.5-Que100	3.69863	27.6604	46.2713	32.5932	PM2.5-Que100	2
PM2.5-Que100	4.09556	28.9648	47.9431	36.508
PM2.5-Que100	3.49481	30.704	43.7458	31.0708
PM2.5-Que100	3.83051	27.0082	45.9148	33.0282
PM2.5-Que100	3.8796	26.356	46.4166	30.8533

## Sheet: Figure2
group1	GSH/GSSG	4-HNE	Iron content
Control	5.5246	4.17205	230.596
Control	4.30085	4.26035	260.632
Control	3.4828	4.41019	243.018
Control	4.37892	4.60578	239.579
Control	4.60113	4.30522	267.439
Control	3.91945	4.22122	252.14
PM2.5	9.56401	2.11918	513.684
PM2.5	8.48845	2.33542	476.281
PM2.5	9.81597	2.54405	495.579
PM2.5	10.1396	2.62438	500.842
PM2.5	8.92287	2.26169	507.789
PM2.5	8.1366	2.64574	488.561
PM2.5-Que50	8.40401	2.9598	479.018
PM2.5-Que50	6.70478	2.83871	449.404
PM2.5-Que50	6.99954	2.59517	460.14
PM2.5-Que50	8.60442	3.02677	483.368
PM2.5-Que50	7.372	2.85854	469.193
PM2.5-Que50	7.84914	2.6118	456.561
PM2.5-Que100	8.06006	2.7212	446.105
PM2.5-Que100	6.96674	3.16539	435.509
PM2.5-Que100	7.31433	2.64673	476.912
PM2.5-Que100	6.6218	3.00648	488.632
PM2.5-Que100	5.38686	2.89311	455.298
PM2.5-Que100	6.88179	3.28558	437.123

## Sheet: Figure3
	Control	PM2.5	PM2.5-Que50	PM2.5-Que100		Control	PM2.5	PM2.5-Que50	PM2.5-Que100		Control	PM2.5	PM2.5-Que50	PM2.5-Que100
TGF-β1	54463	87574	61646	60206	TGF-β1	47181	82941	70364	65814	TGF-β1	48486	99342	80791	68483
GAPDH	187527	185995	171226	177126	GAPDH	171300	166786	187802	188590	GAPDH	163074	167840	187162	197289
Collagen-1	38540	91794	66875	52865	Collagen-1	36002	93637	77657	62755	Collagen-1	30106	88160	78471	51940
GAPDH	187527	185995	171226	177126	GAPDH	171300	166786	187802	188590	GAPDH	163074	167840	187162	197289
nuclear Nrf2	89338	58543	82412	118778	nuclear Nrf2	101461	58467	83681	122705	nuclear Nrf2	113514	78733	88177	107787
PCNA	114220	116031	103120	91358	PCNA	148891	140899	135702	106925	PCNA	198197	187432	145288	134877

## Sheet: Figure4
group1	GSH/GSSG	4-HNE	Iron content
Control	33.5715	2.10893	18.5651
Control	28.2438	2.06663	20.8754
Control	30.5602	2.18176	19.6377
PM2.5	47.2379	0.845725	45.4638
PM2.5	46.1956	1.0609	41.6683
PM2.5	49.091	0.973901	44.7212
Que	31.0235	2.14851	16.0897
Que	27.4331	2.26616	19.4727
Que	25.001	2.10792	18.8951
PM2.5-Que	41.9103	1.29373	38.0378
PM2.5-Que	38.32	1.20117	36.7176
PM2.5-Que	40.7521	1.38696	34.9024
Fer-1	24.3061	2.38359	19.2252
Fer-1	26.3908	2.17949	21.9481
Fer-1	29.9811	2.21711	16.9149
PM2.5-Fer-1	38.4358	1.59869	30.5293
PM2.5-Fer-1	34.9613	1.42161	29.2916
PM2.5-Fer-1	37.1618	1.48388	34.9849

## Sheet: Figure5
	1	2	3	4	5	6		1	2	3	4	5	6		1	2	3	4	5	6
TGF-β1	91424	148017	58746	92435	55450	83488	TGF-β1	52316	105919	52502	96999	61347	95034	TGF-β1	74187	139531	62898	115951	65122	102815
GAPDH	185107	166943	159846	154285	152461	164066	GAPDH	181815	188272	186760	189019	189298	194743	GAPDH	157976	164732	150972	159767	147907	150846

## Sheet: Figure6
	1	2	3	4	5	6		1	2	3	4	5	6		1	2	3	4	5	6
GPX4	106634	57387	91518	79435	95404	93404	GPX4	107824	71527	108142	100390	119025	111608	GPX4	104130	49596	131641	97138	138698	79906
GAPDH	185968	162967	145164	153999	165864	176544	GAPDH	170121	168465	165259	171511	155096	167734	GAPDH	170443	157653	167807	165899	173355	155441
ACSL4	54364	125978	55165	86680	51879	73574	ACSL4	38060	108105	38321	65458	42435	69217	ACSL4	40989	100603	38411	61962	36208	59994
GAPDH	185968	162967	145164	153999	165864	176544	GAPDH	170121	168465	165259	171511	155096	167734	GAPDH	170443	157653	167807	165899	173355	155441
nuclear Nrf2	86027	22648	73985	41616	89488	64164	nuclear Nrf2	97823	39980	107501	72356	140326	97343	nuclear Nrf2	102668	32987	95645	80485	120724	91056
PCNA	135984	130261	138227	122914	122771	140360	PCNA	128948	131053	139827	141727	146562	126934	PCNA	132736	133269	139434	140961	135009	129932
Keap1	78479	147597	69826	106889	70837	101439	Keap1	70086	130880	81167	113193	73995	108964	Keap1	77673	133715	78323	121150	63174	100183
GAPDH	247993	247404	237150	224847	216821	229528	GAPDH	236990	230984	224693	225968	262022	254533	GAPDH	206782	192037	197090	196488	186707	193371
